# Supplementary material for: Connective tissue fibroblasts and Tcf4 regulate myogenesis
Source: Oxford University Press journal article supplement (doi:10.1242/dev.057463), 2010-12-21
Supplement: dev057463supptables1.pdf [file dev057463supptables1.pdf]

**Table S1. Summary of characteristics of embryonic, fetal, neonatal and adult myogenesis**

| Phase     | Time in mouse development | Progenitors                         | Myofiber        | MyHC composition                                                                                                                       |
|-----------|---------------------------|-------------------------------------|-----------------|----------------------------------------------------------------------------------------------------------------------------------------|
| Embryonic | E10.5-12.5                | Pax3 <sup>+</sup> Pax7 <sup>-</sup> | Primary         | MyHCemb and MyHCI                                                                                                                      |
| Fetal     | E14.5-P0                  | Pax3-derived, Pax7 <sup>+</sup>     | Secondary       | MyHCemb and MyHCI<br>OR<br>MyHCemb and MyHCperi                                                                                        |
| Neonatal  | P0-P21                    | Pax3-derived, Pax7 <sup>+</sup>     | Secondary/adult | MyHCemb and MyHCI<br>OR<br>MyHCemb, MyHCperi and MyHCIIa<br>OR<br>MyHCemb, MyHCperi and MyHCIIx<br>OR<br>MyHCemb, MyHCperi and MyHCIIb |
| Adult     | >P21                      | Pax3-derived, Pax7 <sup>+</sup>     | Adult           | MyHCI<br>OR<br>MyHCIIa<br>OR<br>MyHCIIx<br>OR<br>MyHCIIb                                                                               |
