# Supplementary material for: Connective tissue fibroblasts and Tcf4 regulate myogenesis
Source: Oxford University Press journal article supplement (doi:10.1242/dev.057463), 2010-12-21
Supplement: dev057463supptables2.pdf [file dev057463supptables2.pdf]

**Table S2. qPCR primers used in this study**

| Gene            |         | Primer sequence (5'-3')    |               | Product size (bp) using cDNA template |
|-----------------|---------|----------------------------|---------------|---------------------------------------|
| Myh1 (MyHClx)   | Forward | CGGTGGTGGAAAGAAAGG         | Exon 17       | 154                                   |
|                 | Reverse | CAGGAGTCTTGGTTTCATT        | Exon 18       |                                       |
| Myh2 (MyHCIIa)  | Forward | CCAAGAAAGGTGCCAAGAAG       | Exon 17       | 146                                   |
|                 | Reverse | CGGGAGTCTTGGTTTCATTG       | Exon 18       |                                       |
| Myh3 (MyHCemb)  | Forward | GCAAAGACCCGTGACTTCACCTCTAG | Exon 40       | 154                                   |
|                 | Reverse | GCATGTGGAAAAGTGATACGTGG    | Exon 41       |                                       |
| Myh4 (MyHCIIb)  | Forward | GCTTGAAAACGAGGTGGAAA       | Exon 40       | 190                                   |
|                 | Reverse | CCTCCTCAGCCTGTCTCTTG       | Exon 41       |                                       |
| Myh7 (MyHCI)    | Forward | AGGGCGACCTCAACGAGAT        | Exon 35       | 94                                    |
|                 | Reverse | CAGCAGACTCTGGAGGCTCTT      | Exon 35       |                                       |
| Myh8 (MyHCperi) | Forward | GTCACGCAATGCAGAAGAGA       | Exon 36       | 138                                   |
|                 | Reverse | CAGGTCCTTCACCGTCTGTT       | Exon 37       |                                       |
| Tcf7 (Tcf1)     | Forward | TGATGCTGGGATCTGGTGTA       | Exon 6        | 133                                   |
|                 | Reverse | CTTCTCTGCCTTGGGTTCTG       | Exon 7        |                                       |
| Lef1            | Forward | TCAAATAAAGTGCCCGTGGT       | Exon 4        | 187                                   |
|                 | Reverse | GGAGACAGGGGGTAGAAGGT       | Exon 5        |                                       |
| Tcf7L1 (Tcf3)   | Forward | CGGGACAACATATGGGAAGAA      | Exon 10       | 162                                   |
|                 | Reverse | ACGCAGGGCTATCACAAGGC       | Exon 12       |                                       |
| Tcf7L2 (Tcf4)   | Forward | GAGATGAGAGCGAAGGTGGT       | Exon 9        | 218                                   |
|                 | Reverse | CGGCTGCTTGTCTCTTTTC        | Exon 11       |                                       |
| Tcf7L2 (Tcf4)   | Forward | GGAGGAGAAGAAGTCTGGAAAA     | Exon 1        | 266                                   |
|                 | Reverse | AGGTAGGGGCTCGTCAGGT        | Exon 3        |                                       |
| GAPDH           | Forward | GCACCACCAACTGCTTAGC        | Exon 4        | 502                                   |
|                 | Reverse | GCCGTATTCATTGTCATACC       | Exons 6 and 7 |                                       |
