# Supplementary material for: Connective tissue fibroblasts and Tcf4 regulate myogenesis
Source: Oxford University Press journal article supplement (doi:10.1242/dev.057463), 2010-12-21
Supplement: dev057463supptables3.pdf [file dev057463supptables3.pdf]

**Table S3. Summary of genetic data demonstrating intrinsic (myogenic) and extrinsic (fibroblast-mediated) regulation of MyHC levels by Tcf4**

| Genotype                                                                                                                              | Quadriceps  |             |             | Tibialis anterior |             |             | Diaphragm   |             |             |
|---------------------------------------------------------------------------------------------------------------------------------------|-------------|-------------|-------------|-------------------|-------------|-------------|-------------|-------------|-------------|
|                                                                                                                                       | MyHC I      | MyHC IIb    | MyHC emb    | MyHC I            | MyHC IIb    | MyHC emb    | MyHC I      | MyHC IIb    | MyHC emb    |
| <b>P0 Germline Tcf4 LOF</b><br><i>Tcf4<sup>GFP-Cre/GFP-Cre</sup></i> versus <i>Tcf4<sup>+/+</sup></i>                                 | 0.76<br>↓↓↓ | —           | 1.76<br>↑↑↑ | 0.67<br>↓↓↓       | 0.34<br>↓↓↓ | 1.34<br>↑   | 0.48<br>↓↓↓ | 0.71<br>↓   | 2.11<br>↑↑↑ |
| <b>P0 Myogenic Tcf4 LOF</b><br><i>Pax3<sup>Cre/+</sup>;Tcf4<sup>del/fl</sup></i> versus <i>Pax3<sup>+/+</sup>;Tcf4<sup>fl/+</sup></i> | 0.63<br>↓↓↓ | 0.66<br>↓↓↓ | —           | 0.26<br>↓↓↓       | 0.54<br>↓↓↓ | —           | 0.43<br>↓↓↓ | 0.32<br>↓↓↓ | 1.79<br>↑↑↑ |
| <b>P0 Fibroblast Tcf4 LOF</b><br><i>Tcf4<sup>GFP-Cre+neofl</sup></i> versus <i>Tcf4<sup>fl/+</sup></i>                                | 0.82<br>↓↓↓ | —           | —           | 0.84<br>↓         | 0.35<br>↓   | —           | —           | 0.53<br>↓↓↓ | 2.50<br>↑   |
| <b>6 wk Fibroblast Tcf4 LOF</b><br><i>Tcf4<sup>GFP-Cre+neofl</sup></i> versus <i>Tcf4<sup>+/+</sup></i>                               | —           | —           | 2.30<br>↑↑↑ | —                 | 1.30<br>↑↑↑ | 1.54<br>↑↑↑ | —           | 0.36<br>↓↓↓ | 5.13<br>↑   |

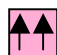

Increase Ave MHC transcript level in mutant  $\geq 1.3$ , \* $p < 0.05$   
Ave MHC transcript level in control

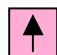

Increase Ave MHC transcript level in mutant  $\geq 1.3$ ,  $.05 < p < 0.09$   
Ave MHC transcript level in control

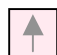

Increase Ave MHC transcript level in mutant  $\geq 2.5$ , but  $p > 0.09$   
Ave MHC transcript level in control

—

No significant change

# =

Ave MHC transcript level in mutant  
Ave MHC transcript level in control

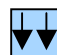

Decrease Ave MHC transcript level in mutant  $\leq 0.80$ , \* $p < 0.05$   
Ave MHC transcript level in control

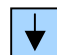

Decrease Ave MHC transcript level in mutant  $\leq 0.80$ ,  $.05 < p < 0.09$   
Ave MHC transcript level in control

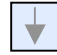

Decrease Ave MHC transcript level in mutant  $\leq .35x$ , but  $p > 0.09$   
Ave MHC transcript level in control
